# Supplementary material for: Evidence of electrochemical transduction of cation recognition by TEMPO derivatives
Source: Royal Society of Chemistry journal article supplement (doi:10.1039/c2nj20796f), 2011-12-08
Supplement: c2nj20796f.pdf [file c2nj20796f.pdf]

## **Electronic Supporting Information for**

### **Evidence of electrochemical transduction of cation recognition by TEMPO derivatives**

**Pierre-Yves Blanchard, Claude Niebel, Séverine Boisard, Olivier Alévêque, Lionel Sanguinet, Marylène Dias, Tony Breton, Christelle Gautier\*, and Eric Levillain\*.**

Laboratoire MOLTECH-Anjou, Université d'Angers – CNRS UMR 6200, 2 boulevard  
Lavoisier 49045, Angers cedex (France). Fax: +33241735405; Tel: +33241735095;

[christelle.gautier@univ-angers.fr](mailto:christelle.gautier@univ-angers.fr), [eric.levillain@univ-angers.fr](mailto:eric.levillain@univ-angers.fr).

**ESI 1:Details about organic synthesis of compounds 1, 2 and 3**

**ESI 2:Details about binding constants calculation**

## ESI 1. Details about organic synthesis of compounds 1, 2 and 3

### ***N*-(2,2,6,6-tetramethylpiperidin-4-yloxy)-2,3,5,6,8,9,11,12,14,15-decahydrobenzo[*b*][1,4,7,10,13,16]hexaoxacyclooctadecine-18-carboxamide (1)**

To a stirred, nitrogen flushed solution of 4-carboxybenzo-18-crown-6 (300 mg, 0.842 mmol) in CH<sub>2</sub>Cl<sub>2</sub> (5 mL) at 0°C were added 4-aminoTEMPO (173 mg, 1.010 mmol, 1.2 eq.) in CH<sub>2</sub>Cl<sub>2</sub> (2 mL), 1-hydroxybenzotriazole (HOBt) (171 mg, 1.263 mmol, 1.5 eq.) and finally dicyclohexylcarbodiimide (DCC, 261 mg, 1.263 mmol, 1.5 eq.). After 1h stirring at 0-5°C and 3 days at room temperature under N<sub>2</sub>, CH<sub>2</sub>Cl<sub>2</sub> (30 mL) was added and the solution was filtered. The filtrate was washed three times with water (30 mL), dried over MgSO<sub>4</sub> and filtered. The solvent was evaporated under reduced pressure and the resulting residue was purified by column chromatography (silica gel, eluent CH<sub>2</sub>Cl<sub>2</sub>/MeOH 9/1) giving 1 as an orange powder (300 mg, 82 %).

<sup>1</sup>H NMR (300 MHz, CDCl<sub>3</sub>) δ ppm: 7.60-7.30 (m, 2H, H<sub>ar</sub>), 6.90 (br s, 1H, H<sub>ar</sub>), 4.22 (br s, 4H, CH<sub>2</sub>-O-C<sub>ar</sub>), 3.96 (br s, 4H, CH<sub>2</sub>-O), 3.80-3.60 (m, 13H, CH<sub>2</sub>-O and CH-NH), 1.64 (br s, 4H), 1.27 (br s, 12H, CH<sub>3</sub>). <sup>13</sup>C NMR (75 MHz, CDCl<sub>3</sub>) δ ppm: 162.6, 147.7, 144.5, 125.7, 118.2, 109.6, 108.7, 66.6, 65.3, 65.0, 25.5. HR-MS: *m/z* 509.2876 [M]<sup>+</sup> (calc. for C<sub>26</sub>H<sub>41</sub>N<sub>2</sub>O<sub>8</sub>: 509.2863). m.p. = 116°C

### **(1,4,7,10,13,16-hexaoxacyclooctadecan-2-yl)methyl (2,2,6,6-tetramethylpiperidin-4-yloxy)carboxylate (2)**

To a stirred solution of 4-carboxy-TEMPO (50 mg, 0.250 mmol) in CH<sub>2</sub>Cl<sub>2</sub> (4 mL) were added 4-dimethylaminopyridine (DMAP, 3mg, 0.025 mmol, 0.1 eq.) and 2-hydroxymethyl-18-crown-6 (160 mg, 0.544 mmol, 2.2 eq.) in CH<sub>2</sub>Cl<sub>2</sub> (1 mL). The mixture was cooled in an ice bath and dicyclohexylcarbodiimide (DCC, 81 mg, 0.393 mmol, 1.6 eq.) was added. After 5 min stirring at 0-5°C and 3 days at room temperature, the white precipitate was filtered. The filtrate was washed three times with water (30 mL), dried over MgSO<sub>4</sub> and filtered. The solvent was evaporated under reduced pressure and the resulting residue was purified by column chromatography (silica gel, eluent CH<sub>2</sub>Cl<sub>2</sub>/MeOH 92/8) giving 2 as an orange oil (60 mg, 50 %).

<sup>1</sup>H NMR (300 MHz, CDCl<sub>3</sub>) δ ppm: 4.48-4.35 (m, CH<sub>2</sub>OCO), 3.82 (m, CH<sub>2</sub>O), 1.20-1.10 (m, TEMPO). <sup>13</sup>C NMR (75 MHz, CDCl<sub>3</sub>) δ ppm: 180, 73.94, 67.82, 67.77, 67.72, 67.63, 67.56, 66.61, 61.21, 26.54. HR-MS: *m/z* 476.2850 [M]<sup>+</sup> (calc. for C<sub>23</sub>H<sub>42</sub>NO<sub>9</sub>: 476.2859).

### **(1,4,7,10,13-pentaoxa-16-azacyclooctadecan-16-yl)(2,2,6,6-tetramethylpiperidin-4-yloxy)methanone (3)**

To a stirred, nitrogen flushed solution of 4-carboxy-TEMPO (125 mg, 0.624 mmol) in CH<sub>2</sub>Cl<sub>2</sub> (5 mL) at 0°C were added 1-aza-18-crown-6 (190 mg, 0.722 mmol, 1.15 eq.) in CH<sub>2</sub>Cl<sub>2</sub> (5 mL), 1-hydroxybenzotriazole (HOBt) (126 mg, 0.936 mmol, 1.5 eq.) and finally dicyclohexylcarbodiimide (DCC, 193 mg, 0.936 mmol, 1.5 eq.). After 1h stirring at 0-5°C and 7 days at room temperature under N<sub>2</sub>, CH<sub>2</sub>Cl<sub>2</sub> (30 mL) was added and the solution was filtered. The filtrate was washed three times with water (30 mL), dried over MgSO<sub>4</sub> and

filtered. The solvent was evaporated under reduced pressure and the resulting residue was purified by column chromatography (silica gel, eluent CH<sub>2</sub>Cl<sub>2</sub>/MeOH 94/6) giving 3 as a red oil (128 mg, 46 %).

<sup>1</sup>H NMR (300 MHz, CDCl<sub>3</sub>) δ ppm: 4.00-3.50 (m, 24H, CH<sub>2</sub>-N and CH<sub>2</sub>-O), 1.55 (br s, 5H), 1.27 (br s, 12H, CH<sub>3</sub>). <sup>13</sup>C NMR (75 MHz, CDCl<sub>3</sub>) δ ppm: 70.4, 69.9, 69.7, 69.6, 69.5, 69.4, 69.2, 68.9, 68.5, 47.9, 47.1, 28.4. HR-MS: *m/z* 445.2901 [M]<sup>•+</sup> (calc. for C<sub>22</sub>H<sub>41</sub>N<sub>2</sub>O<sub>7</sub>: 445.2914).

## ESI 2.Details about binding constants calculation

The usual method described by Pistolis and Malliaris in reference 23 (G. Pistolis and A. Malliaris, *Chemical Physics Letters*, 1999, **310**, 501-507) was used to determine binding constants. Experimental data ( at  $\lambda=263\text{nm}$ ,  $T=293\text{K}$  ) were fitted with sigmaplot software using the following equations:

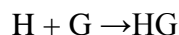

$$ABS(\lambda, x) = \varepsilon(H) \cdot \ell \cdot [H] + \varepsilon(HG) \cdot \ell \cdot [HG]$$

$$\text{with } \left\{ \begin{array}{l} [G_0] = x \cdot [H_0] \text{ (} x = \text{nb of equivalent) and } \varepsilon, \lambda, \ell, K \text{ have their usual meanings} \\ \varepsilon(H) = \frac{ABS(\lambda, x=0)}{\ell \cdot [H_0]} \\ [H] = \frac{\sqrt{\left([H_0] - x \cdot [H_0] - \frac{1}{K}\right)^2 + \frac{4[H_0]}{K}}}{2} + \frac{[H_0]}{2} - \frac{x \cdot [H_0]}{2} - \frac{1}{2K} \\ [HG] = -\frac{\sqrt{\left([H_0] - x \cdot [H_0] - \frac{1}{K}\right)^2 + \frac{4[H_0]}{K}}}{2} + \frac{[H_0]}{2} + \frac{x \cdot [H_0]}{2} + \frac{1}{2K} \end{array} \right.$$
